# Supplementary material
Source: PubMed Central journal article supplement (PMC3589158)

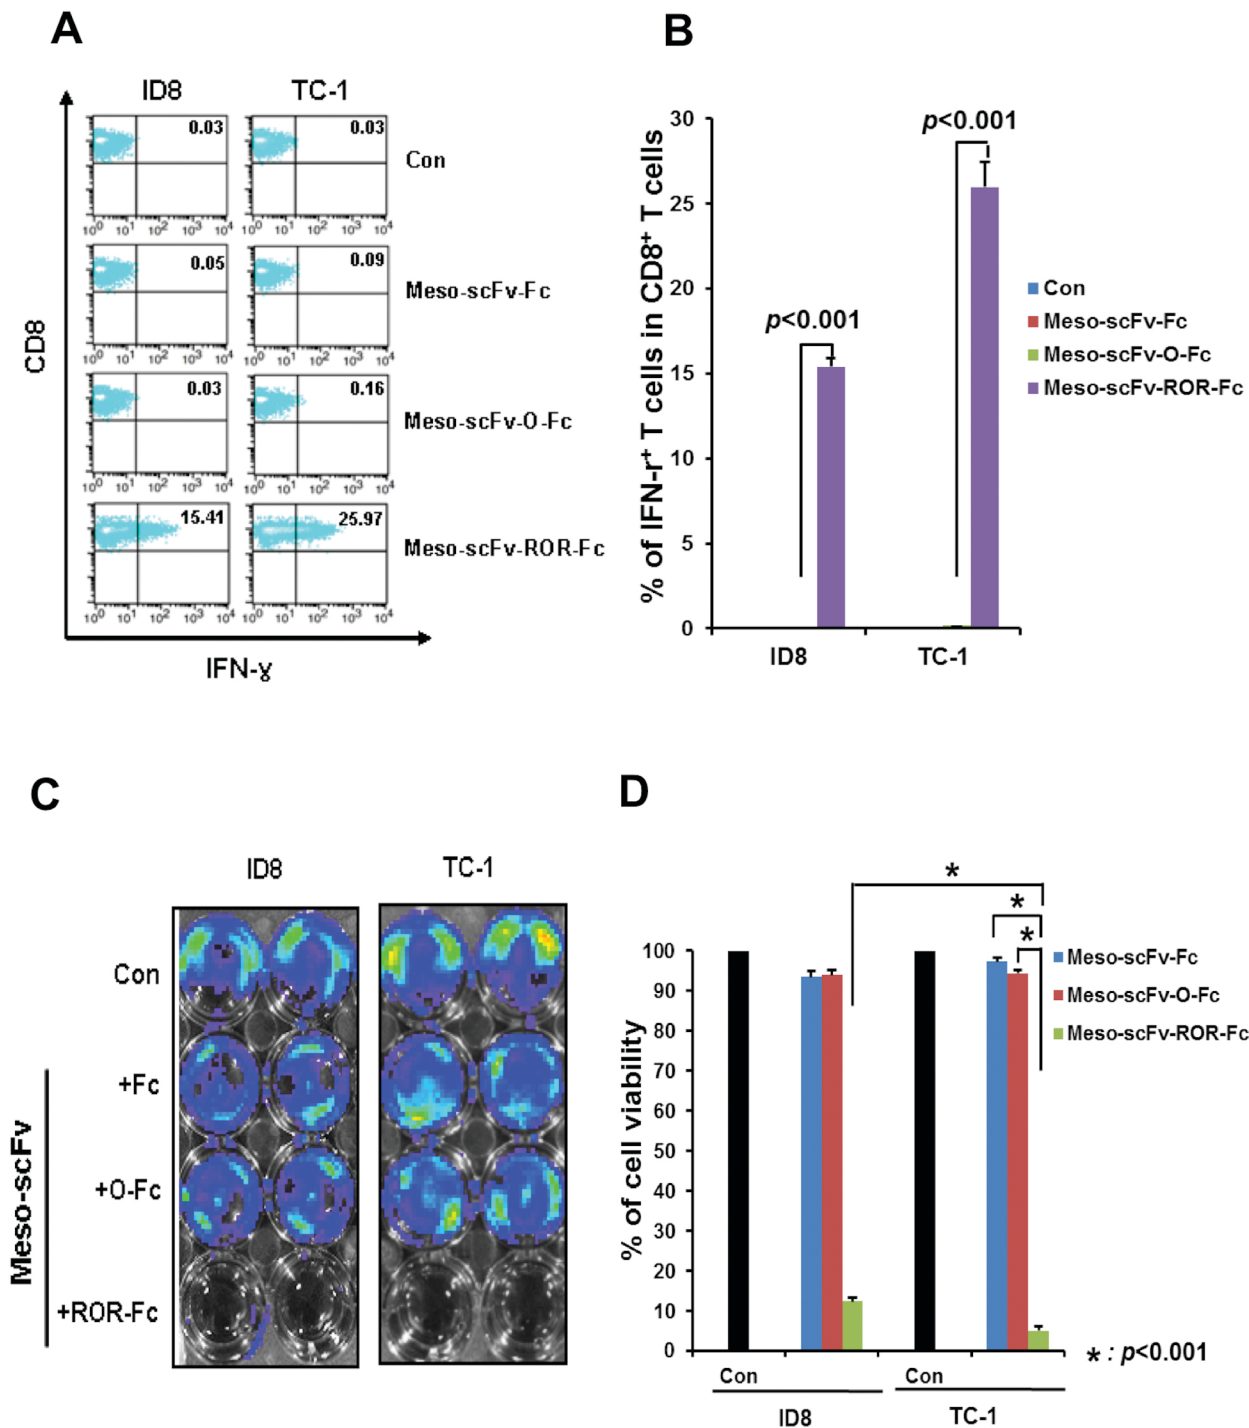

Supplement: mt2012233x1.pdf [file mt2012233x1.pdf]

**A**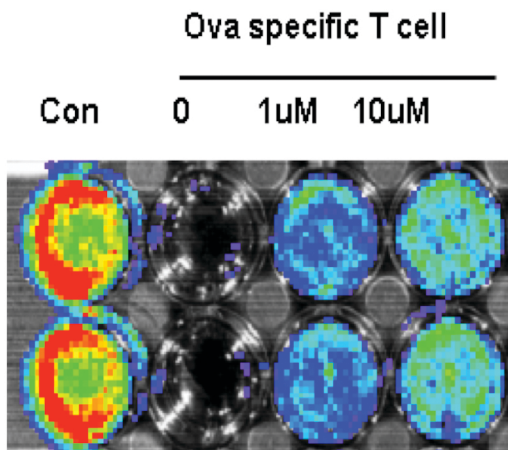**B**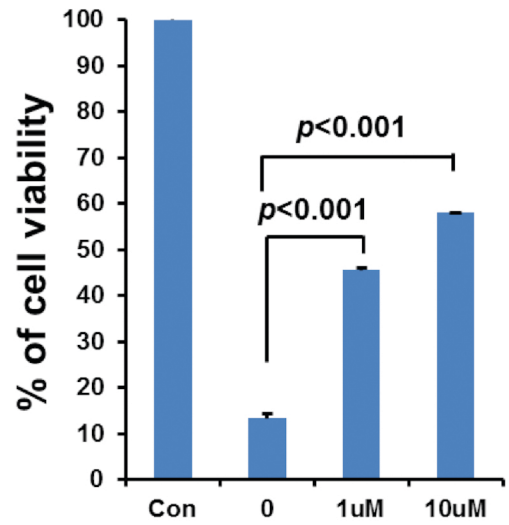

Supplement: mt2012233x2.pdf [file mt2012233x2.pdf]

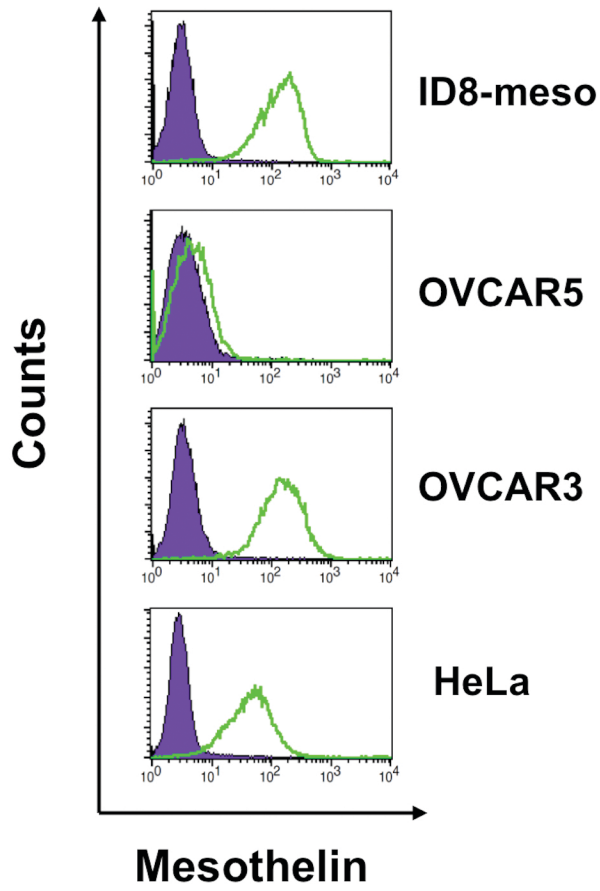

Supplement: mt2012233x3.pdf [file mt2012233x3.pdf]
